# Supplementary material
Source: PubMed Central journal article supplement (PMC5687276)
Supplement: NIHMS907721-supplement-1.pdf [file NIHMS907721-supplement-1.pdf]

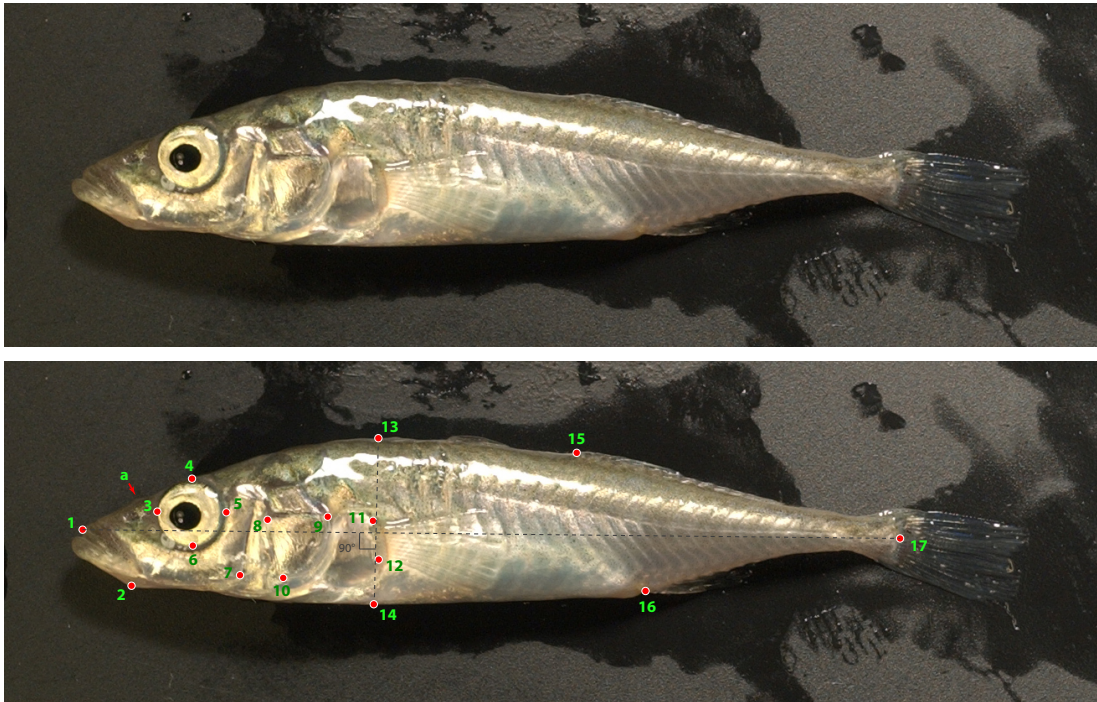

1. anterior tip of the upper jaw (anterior-most extent of the premaxilla; see a, below)
  2. posterior-ventral corner of the lower jaw (border between the angular-articular and quadrate bones)
  3. anterior-most point (edge) of the orbit
  4. dorsal-most point (edge) of the orbit
  5. posterior-most point (edge) of the orbit
  6. ventral-most point (edge) of the orbit
  7. inner corner of the preoperculum
  8. anterior-dorsal corner of the operculum
  9. posterior-dorsal corner of the operculum
  10. ventral corner of the operculum
  11. dorsal insertion of the pectoral fin
  12. ventral insertion of the pectoral fin
  13. dorsum of the trunk over the pectoral fin midpoint
  14. ventrum of the trunk under the pectoral fin midpoint
  15. anterior insertion of the dorsal fin
  16. anterior insertion of the anal fin
  17. posterior midpoint of the caudal peduncle
- a. posterior end of the premaxilla's ascending process (the premaxilla is V-shaped)

**Figure S1. Locations of 17 landmarks used in morphometric analysis. Related to Figure 1.**

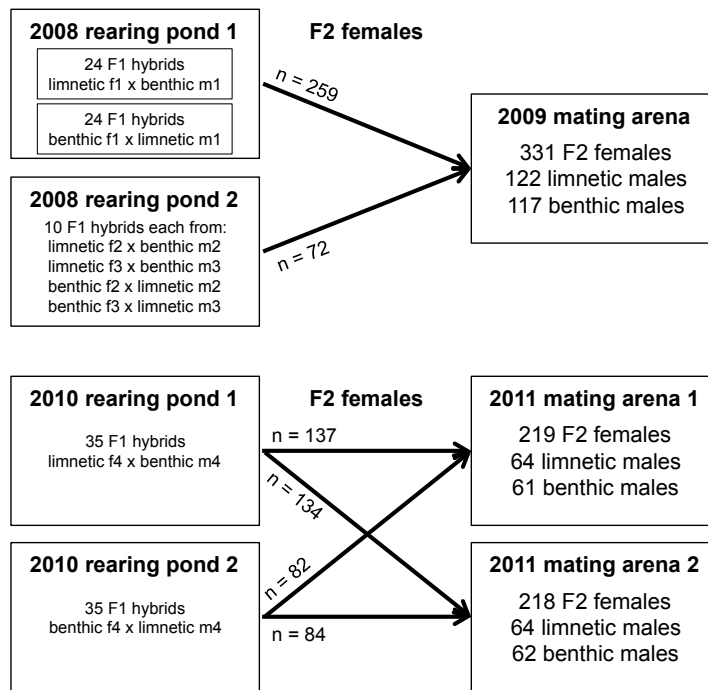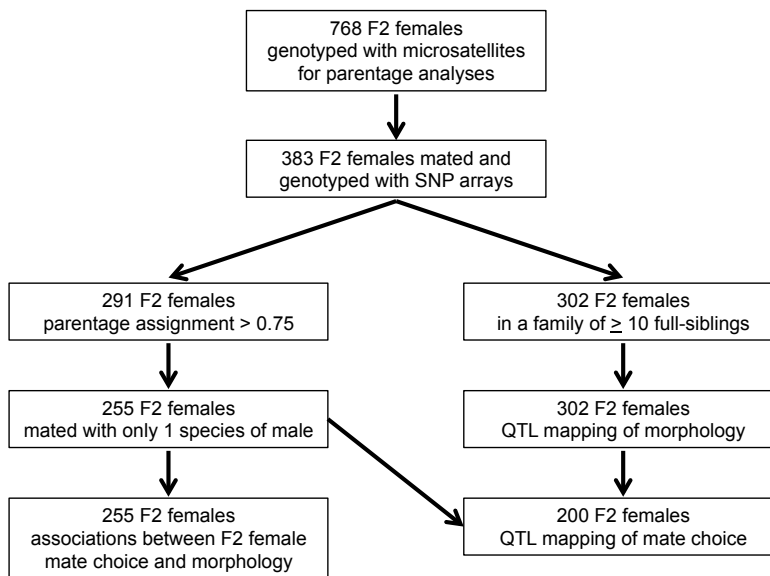

**Figure S2. Overview of experimental design and analysis. Related to STAR Methods.**

| Landmark | PC2     | LD1        |
|----------|---------|------------|
| x1       | 0.216   | 26.839     |
| y1       | -0.317* | 4577.351*  |
| x2       | 0.221   | -744.582   |
| y2       | -0.272* | 3823.246*  |
| x3       | 0.030   | 221.469    |
| y3       | 0.111   | 3577.608*  |
| x4       | -0.083  | 722.195    |
| y4       | 0.023   | 3117.165*  |
| x5       | -0.166  | 242.918    |
| y5       | 0.137   | 2624.617   |
| x6       | -0.061  | -231.759   |
| y6       | 0.208   | 3100.080   |
| x7       | -0.004  | -589.378   |
| y7       | -0.054  | 2447.137   |
| x8       | -0.125  | 211.181    |
| y8       | 0.184   | 2010.066   |
| x9       | -0.060  | 220.541    |
| y9       | 0.149   | 1341.069   |
| x10      | -0.020  | -571.613   |
| y10      | 0.040   | 1866.242   |
| x11      | 0.071   | 92.302     |
| y11      | 0.076   | 659.106    |
| x12      | 0.019   | -420.228   |
| y12      | 0.025   | 514.774    |
| x13      | 0.048   | 1215.315   |
| y13      | 0.229   | 550.743    |
| x14      | 0.042   | -1044.044  |
| y14      | -0.369* | 579.358    |
| x15      | -0.203  | 1069.442   |
| y15      | 0.277*  | -1922.137  |
| x16      | 0.256   | -726.822   |
| y16      | -0.314* | -2864.858  |
| x17      | -0.179  | 181.686    |
| y17      | -0.133  | -6244.713* |

**Table S1. Scaling of principal component axis 2 (PC2) and linear discriminant function 1 (LD1) by morphological landmarks. Related to Figure 1.** Note that for visualization purposes, LD1 scores are multiplied by -1 so that directionality corresponds with PC2; a more benthic phenotype is indicated by higher and positive numbers. For each analysis, the top five landmarks are indicated with an asterisk.

| Trait                 | n   | LOD  | Chr | Position (cM) | Nearest SNP     | Mean ± SE (LL) | Mean ± SE (LB) | Mean ± SE (BB) |
|-----------------------|-----|------|-----|---------------|-----------------|----------------|----------------|----------------|
| mate choice           | 200 | 4.5  | 14  | 22.43         | chrXIV:1713227  | 0.641 ± 0.08   | 0.706 ± 0.04   | 0.863 ± 0.06   |
| mate choice           | 200 | 4.61 | 21  | 8             | chrXXI:9373717  | 0.58 ± 0.06    | 0.83 ± 0.05    | 0.614 ± 0.11   |
| discriminant function | 302 | 4.83 | 12  | 17            | chrXII:7504339  | -0.15 ± 0.13   | 0.249 ± 0.08   | 0.54 ± 0.13    |
| discriminant function | 302 | 4.23 | 14  | 8.1           | chrXIV:4632223  | -0.228 ± 0.17  | 0.279 ± 0.08   | 0.393 ± 0.12   |
| PC2                   | 302 | 4.04 | 4   | 30.76         | chrIV:11367975  | -0.012 ± 0.008 | 0.012 ± 0.004  | 0.019 ± 0.006  |
| PC2                   | 302 | 6.67 | 7   | 47            | chrVII:26448674 | 0.02 ± 0.007   | 0.015 ± 0.005  | -0.013 ± 0.008 |
| centroid size         | 302 | 6.97 | 9   | 47.8          | chrIX:19745222  | 4.868 ± 0.12   | 5.074 ± 0.04   | 5.133 ± 0.08   |
| <b>x2*</b>            | 302 | 3.93 | 7   | 60            | chrUn:29400087  | -1.208 ± 0.004 | -1.21 ± 0.002  | -1.198 ± 0.004 |
| y2*                   | 302 | 9.99 | 4   | 32            | chrIV:11367975  | -0.309 ± 0.003 | -0.328 ± 0.002 | -0.334 ± 0.003 |
| x3                    | 302 | 4.45 | 1   | 32.3          | chrI:15145305   | -1.101 ± 0.002 | -1.094 ± 0.001 | -1.089 ± 0.002 |
| x4                    | 302 | 5.13 | 16  | 30.9          | chrXVI:12111717 | -0.881 ± 0.002 | -0.889 ± 0.001 | -0.891 ± 0.002 |
| x5*                   | 302 | 4.54 | 15  | 6             | chrXV:505537    | -0.666 ± 0.003 | -0.675 ± 0.002 | -0.669 ± 0.003 |
| y5                    | 302 | 4.21 | 4   | 24.9          | chrIV:15721538  | 0.099 ± 0.002  | 0.101 ± 0.001  | 0.108 ± 0.001  |
| x6                    | 302 | 3.96 | 16  | 29.5          | chrXVI:13588796 | -0.877 ± 0.002 | -0.885 ± 0.002 | -0.885 ± 0.003 |
| y6*                   | 302 | 4.14 | 9   | 30.2          | chrIX:18942598  | -0.111 ± 0.003 | -0.103 ± 0.002 | -0.105 ± 0.003 |
| y15*                  | 302 | 5.3  | 2   | 27            | chrII:19324477  | 0.499 ± 0.005  | 0.5 ± 0.004    | 0.479 ± 0.005  |
| x16                   | 302 | 5.49 | 7   | 60            | chrUn:29400087  | 1.906 ± 0.006  | 1.883 ± 0.004  | 1.854 ± 0.007  |
| x17                   | 302 | 4.92 | 1   | 32.8          | chrI:14261764   | 3.369 ± 0.004  | 3.38 ± 0.003   | 3.392 ± 0.004  |

**Table S2. Significant QTL loci for mate choice and morphology. Related to Figures 2 and 3.** For each QTL, the table shows the number of F2 females used in analysis (n), log odds ratio (LOD), chromosome (Chr), position in centiMorgans (cM), nearest SNP, and mean and standard errors (SE) for the trait estimated in each genotype category – limnetic homozygote (LL), heterozygote (LB), and benthic homozygote (BB). QTL significance ( $\alpha=0.1$ ) was determined based on 10,000 permutations. The landmark coordinates significantly associated with mate choice are highlighted with an asterisk.

| Marker    | Genotyped  | Chr | Forward primer (5' to 3') | Reverse primer (5' to 3') |
|-----------|------------|-----|---------------------------|---------------------------|
| LG1_7.59  | 2009, 2011 | 1   | TGGACGAGTGCCAACATAAA      | TTTTGGCAGCTCGGAATATC      |
| LG1_27.1  | 2009       | 1   | GAAGGAGGTTGGACATAAAGG     | CTGCCTGCTTCTCAAATACC      |
| Stn27     | 2009, 2011 | 2   | TCCTCTGGGACAGTTGAGC       | CTGAGAAGCTGCAGGAAGCC      |
| Stn20     | 2009, 2011 | 2   | CCAGATCATGTGTAACGGC       | AAGGCTCAGCTGTGATCTGG      |
| Stn32     | 2009, 2011 | 3   | CAGATTTCTCTCCAGACGG       | TGTATGCGCAGTGAGTAGGG      |
| Stn45     | 2009, 2011 | 4   | ACGAGGGTTTGAGTCTCTCC      | GTTGTTCAATCCATCCGTCC      |
| Stn309    | 2009, 2011 | 4   | AACTGTGCAGATCTATGCCG      | GGAAGTTGTAAAGAAAGGCCG     |
| Stn241    | 2009, 2011 | 5   | GACCTCCAGAACCAGGAAGG      | CTTTACCAAGGTGAGGGACG      |
| Stn85     | 2009, 2011 | 8   | ACAGGACACCAGTGTAGCCC      | ATGAGCGTGTCTCTTTCCC       |
| Stn98     | 2009       | 8   | CAAAGTGCACACTACGTGCG      | AGTGAATAAAGGGAACCCG       |
| Stn225    | 2009, 2011 | 9   | AACATCGGAGACCACTGACG      | ACGAGGCAACTTCCTTCTGC      |
| Stn119    | 2009, 2011 | 10  | CTCTACTGCTTCTCCATGC       | TGAGCCTTCACAGACCACC       |
| LG11_4.0  | 2009, 2011 | 11  | GGCCATTAGAGTCATCAAGC      | GCACATGAGTGAGAGTGTGC      |
| Gac7033   | 2009, 2011 | 11  | AGGTGGATTGGTTTTCTG        | GGACGCTCGCTCTTTC          |
| Stn148    | 2011       | 13  | AACCCTTACTCAACTCAGCCC     | GAGGAACTTCATTTGGCAGC      |
| Stn163    | 2009, 2011 | 14  | GAGAAGACAACAGGGAAGCG      | CGCCTGCAGTCAACCTACC       |
| LG15_13.4 | 2011       | 15  | CAGGGTTTCACTTCAACC        | CACAGAATGGCTGATTACGC      |
| Stn344    | 2009, 2011 | 17  | TTTGTTGGGATCTGGAGACG      | GAGCTCTTCAAGCTGGTTCC      |
| Stn305    | 2011       | 18  | TGATCCAACGGTCAGATTCC      | GTTACCTGGCGAGGACG         |
| Stn290    | 2009, 2011 | 19  | CATCCAGAGCCTGTTTGAGG      | TCACGGACTGTGGATCAGC       |
| Stn194    | 2009, 2011 | 19  | ACACTCTGCTCTCGCTCCG       | TGAAAGGCTTACTGTTCCG       |

**Table S3. Microsatellite markers used for parentage assignments. Related to Figures 1 and 2.** For each marker, the mate choice experiment year in which that marker was genotyped, the chromosome (Chr), and the primer sequences are given.
